# Supplementary material for: Germ Line/Multipotency Genes Show Differential Expression during Embryonic Development of the Annelid Enchytraeus coronatus
Source: MDPI journal article supplement (doi:10.3390/biology12121508), 2023-12-10
Supplement: s1 [file s1]

## Article

# Supplementary Materials for Germ Line/Multipotency Genes Show Differential Expression during Embryonic Development of the Annelid *Enchytraeus coronatus*

Roman P. Kostyuchenko \*, Daria D. Nikanorova and Artem V. Amosov

Department of Embryology, St. Petersburg State University, Universitetskaya nab. 7-9, 199034 St. Petersburg, Russia; daria.nikanorova@mail.ru (D.D.N.), artem221199@mail.ru (A.V.A.)

\* Correspondence: r.kostyuchenko@spbu.ru; Tel.: +7-812-3289453

**Table S1.** Primer sequences used to clone fragments of the *Eco-vasa1*, *Eco-vasa2*, *Eco-pl10-1*, *Eco-pl10-2*, *Eco-piwi1A*, *Eco-piwi1B*, *Eco-nanos1*, *Eco-nanos2*, *Eco-myc*, *Eco-pumilio2*, *Eco-pumilio3*, *Eco-tudor1*, *Eco-tudor2*, *Eco-tudor3*, *Eco-boule1*, *Eco-boule2*, *Eco-bruno1*, *Eco-bruno2*, *Eco-bruno3*, and *Eco-bruno4* genes presented in the paper.

|                     |         |                                    |
|---------------------|---------|------------------------------------|
| <i>Eco-vasa1</i>    | forward | 5'-CCCAACGCTGATAAGATGCCTGTC-3'     |
|                     | reverse | 5'-GGTTCTCGAGGAAGTTTGAATCTC-3'     |
| <i>Eco-vasa2</i>    | forward | 5'-GAGAAGATGGTAAGCCGAAGCCC-3'      |
|                     | reverse | 5'-CCACTCTGTATCATCGTTAGCAGC-3'     |
| <i>Eco-pl10-1</i>   | forward | 5'-GGTGGAATCGTTTGAGGGAGGAGGAG-3'   |
|                     | reverse | 5'-CACCATTACCTCCCCCTCTCCTGTC-3'    |
| <i>Eco-pl10-2</i>   | forward | 5'-CGAATGATTGGACTAAACCACTGCCC-3'   |
|                     | reverse | 5'-GGTAATCCCGCGAGGCAAATCCAGTG-3'   |
| <i>Eco-piwi1A</i>   | forward | 5'-GGCGAGCACGTTGAGAAAGAAAG-3'      |
|                     | reverse | 5'-GGCTGGAGTCTAGTCGTGCTGTC-3'      |
| <i>Eco-piwi1B</i>   | forward | 5'-GTTTGATGGGATGGGTCTGCTGTTTC-3'   |
|                     | reverse | 5'-GAGGTTAGAGTTGTCGTAGATGAC-3'     |
| <i>Eco-nanos1</i>   | forward | 5'-CTCGCCGATGTCTAGCCGTTCTTC-3'     |
|                     | reverse | 5'-CTCAGAGAATCGCCTGTGTTGTATG-3'    |
| <i>Eco-nanos2</i>   | forward | 5'-CCCTCCACTAATTCTTCCACTAATCC-3'   |
|                     | reverse | 5'-CTACAGTTTGGCCCCAGTAGATTAAACC-3' |
| <i>Eco-myc</i>      | forward | 5'-CTCTAAACTGGCTGGAAGACGGAC-3'     |
|                     | reverse | 5'-CCCTGTCGAGCCTTGGCATTCTC-3'      |
| <i>Eco-pumilio2</i> | forward | 5'-CAATACGCTCTGCCTACTGACCAAATAC-3' |
|                     | reverse | 5'-CCGTATGGGTGCATGGCTAGGTTTC-3'    |
| <i>Eco-pumilio3</i> | forward | 5'-CAATGCAGGATTTCAAGGAGGCG-3'      |
|                     | reverse | 5'-GCTGTAGGGTAGTGCTGCCACCTG-3'     |
| <i>Eco-tudor1</i>   | forward | 5'-CCAACGCTAGACAGCTGGATAACC-3'     |
|                     | reverse | 5'-GTCAGTGTAGCTCTGTACCAGGAC-3'     |
| <i>Eco-tudor2</i>   | forward | 5'-CAAAGAGTTCAGCAGCAGTTGTGTG-3'    |
|                     | reverse | 5'-GTCCCCAGACACCGGTCTCAACTC-3'     |

|                   |         |                                    |
|-------------------|---------|------------------------------------|
| <i>Eco-tudor3</i> | forward | 5'-GATGACATCACTGCGGAGGCTGAG-3'     |
|                   | reverse | 5'-CTTTGAGGCCACATCTTCCCCATC-3'     |
| <i>Eco-boule1</i> | forward | 5'-CTACATTCTATCCGTCTAGACAGCAAAC-3' |
|                   | reverse | 5'-CTGCATATCCACAGCTGATGACGG-3'     |
| <i>Eco-boule2</i> | forward | 5'-CTTCATTGTCGTCGCTGTGAGTCC-3'     |
|                   | reverse | 5'-CATCAGCTGAACATGACCGCCTG-3'      |
| <i>Eco-bruno1</i> | forward | 5'-GAACACTCAACCAATCACAGCAGAG-3'    |
|                   | reverse | 5'-CACAGACCGTTAGCGAGAGCAGC-3'      |
| <i>Eco-bruno2</i> | forward | 5'-CTGAATGCAGCAACCAGTGGGTCC-3'     |
|                   | reverse | 5'-GTAGAGGGTGGTATCAGACTTGGG-3'     |
| <i>Eco-bruno3</i> | forward | 5'-GTTCTGTTCCGTGCAACCGTATCG-3'     |
|                   | reverse | 5'-GTACGGTCGATTGGCGTCTTTAGG-3'     |
| <i>Eco-bruno4</i> | forward | 5'-GCATGTTTCATCGGCTGCGACTC-3'      |
|                   | reverse | 5'-CTCTTCAGTTGGACTTTCAACCTCTTC-3'  |

**Table S2.** GenBank accession numbers for sequences used for Pl10 and Vasa amino acid alignments.

| Phylum          | Species                        | Gene name in tree | GenBank #      |
|-----------------|--------------------------------|-------------------|----------------|
| Annelida        | <i>Alitta virens</i>           | Avi_pl10          | AJW77404.1     |
|                 | <i>Capitella teleta</i>        | Cte_pl10          | ELU14120.1     |
|                 | <i>Enchytraeus coronatus</i>   | Eco_pl10_1        | OR750674       |
|                 | <i>Enchytraeus coronatus</i>   | Eco_pl10_2        | OR750675       |
|                 | <i>Helobdella robusta</i>      | Hro_pl10          | XP_009010523.1 |
|                 | <i>Platynereis dumerilii</i> , | Pdu_pl10          | CAJ15140.1     |
|                 | <i>Pristina longiseta</i>      | Plo_pl10          | JX264564       |
|                 | <i>Alitta virens</i>           | Avi_vasa          | AJW77403.1     |
|                 | <i>Capitella teleta</i>        | Cte_vasa          | ELU18906.1     |
|                 | <i>Enchytraeus coronatus</i>   | Eco_vasa1         | OR750672       |
|                 | <i>Enchytraeus coronatus</i>   | Eco_vasa2         | OR750673       |
|                 | <i>Enchytraeus japonensis</i>  | Eja_vasa          | BAF76795.1     |
|                 | <i>Helobdella robusta</i>      | Hro_vasa          | XP_009030586.1 |
|                 | <i>Platynereis dumerilii</i>   | Pdu_vasa          | CAJ38803.1     |
|                 | <i>Pristina leidy</i>          | Ple_vasa          | AIM52096.1     |
|                 | <i>Pristina longiseta</i>      | Plo_vasa          | JX264563       |
|                 | <i>Tubifex tubifex</i>         | Ttu_vasa          | BAD90012.1     |
| Platyhelminthes | <i>Macrostomum lignano</i>     | Mli_pl10          | PAA56642.1     |
|                 | <i>Schistosoma japonicum</i>   | Sja_pl10          | KAH8852518.1   |
| Mollusca        | <i>Crassostrea gigas</i>       | Cgi_pl10          | XP_011446932.2 |
|                 | <i>Patella vulgata</i>         | Pvu_pl10          | XP_050413768.1 |
|                 | <i>Crassostrea gigas</i>       | Cgi_vasa          | XP_034310873.1 |
|                 | <i>Lottia gigantea</i>         | Lgi_vasa          | XP_009057808.1 |
|                 | <i>Patella vulgata</i>         | Pvu_vasa          | XP_050411929.1 |

|               |                                      |           |                |
|---------------|--------------------------------------|-----------|----------------|
| Arthropoda    | <i>Pecten maximus</i>                | Pma_vasa  | P_033738811.1  |
|               | <i>Drosophila melanogaster</i>       | Dme_belle | NP_536783.1    |
|               | <i>Tribolium castaneum</i>           | Tca_belle | NP_001153721.1 |
|               | <i>Drosophila melanogaster</i>       | Dme_vasa  | CAA31405.1     |
| Echinodermata | <i>Tribolium castaneum</i>           | Tca_vasa  | EFA07550.1     |
|               | <i>Strongylocentrotus purpuratus</i> | Spu_pl10  | XP_030838128.1 |
|               | <i>Lytechinus variegatus</i> ,       | Lva_pl10  | XP_041483221.1 |
|               | <i>Patiria miniata</i>               | Pmi_pl10  | XP_038050100.1 |
|               | <i>Strongylocentrotus purpuratus</i> | Spu_vasa  | NP_001139665.1 |
|               | <i>Lytechinus variegatus</i>         | Lva_vasa  | XP_041475118.1 |
| Hemichordata  | <i>Patiria miniata</i>               | Pmi_vasa  | XP_038056422.1 |
|               | <i>Ptychodera flava</i>              | Pfl_vasa  | QOW95195.1     |
|               | <i>Saccoglossus kowalevskii</i>      | Sko_vasa  | XP_006825896.1 |
| Chordata      | (outgroup) <i>Mus musculus</i>       | Mmu_p68   | AAB53236.1     |
|               | <i>Mus musculus</i>                  | Mmu_pl10  | NP_149068.1    |
|               | <i>Danio rerio</i>                   | Dre_pl10  | AAH59794.1     |
|               | <i>Mus musculus</i>                  | Mmu_vasa  | NP_001139357.1 |
|               | <i>Danio rerio</i>                   | Dre_vasa  | AAI29276.1     |
|               | <i>Branchiostoma floridae</i>        | Bfl_vasa  | XP_035672419.1 |
| Cnidaria      | <i>Actinia tenebrosa</i>             | Ate_pl10  | XP_031554871.1 |
|               | <i>Clytia hemisphaerica</i>          | Che_pl10  | AFD28592.1     |
|               | <i>Hydra vulgaris</i>                | Hvu_pl10  | XP_047130892.1 |
|               | <i>Nematostella vectensis</i>        | Nve_pl10  | XP_048589030.1 |
|               | <i>Actinia tenebrosa</i>             | Ate_vasa  | XP_031562414.1 |
|               | <i>Nematostella vectensis</i>        | Nve_vasa  | AFP87471.1     |

**Table S3.** GenBank accession numbers for sequences used for Piwi amino acid alignments.

| Phylum   | Species                      | Gene name in tree | GenBank #  |
|----------|------------------------------|-------------------|------------|
| Annelida | <i>Aeolosoma viride</i>      | Avr_piwi          | AQV09901.1 |
|          | <i>Alitta virens</i>         | Avi_piwi1         | AJW77405.1 |
|          | <i>Alitta virens</i>         | Avi_piwi2         | AJW77406.1 |
|          | <i>Capitella teleta</i>      | Cte_piwi1         | DAA34898.1 |
|          | <i>Capitella teleta</i>      | Cte_piwi2         | ELU02261.1 |
|          | <i>Eisenia fetida</i>        | Efe_piwi2         | AUS83924.1 |
|          | <i>Enchytraeus coronatus</i> | Eco_piwi1A        | OR750676   |
|          | <i>Enchytraeus coronatus</i> | Eco_piwi1B        | OR750677   |
|          | <i>Pristina leidy</i>        | Ple_piwi          | AIM52094.1 |
|          | <i>Pristina leidy</i>        | Ple_piwi2         | AIM52095.1 |
|          | <i>Pristina longiseta</i>    | Plo_piwi_A        | JX264566   |
|          | <i>Pristina longiseta</i>    | Plo_piwi_1        | OR203685   |
|          | <i>Pristina longiseta</i>    | Plo_piwi_2        | JX264567   |

|               |                                      |           |                |
|---------------|--------------------------------------|-----------|----------------|
|               | <i>Platynereis dumerilii</i>         | Pdu_piwi  | CAJ28986.1     |
|               | <i>Platynereis dumerilii</i>         | Pdu_piwiB | AZG02837.1     |
| Mollusca      | <i>Crassostrea virginica</i>         | Cvi_piwi  | XP_022338755.1 |
|               | <i>Patella vulgata</i>               | Pvu_piwi  | XP_050410271.1 |
| Brachiopoda   | <i>Lingula anatina</i>               | Lan_piwi  | XP_013405373.1 |
| Arthropoda    | <i>Drosophila melanogaster</i>       | Dme_piwi  | AAD08705.1     |
| Echinodermata | <i>Strongylocentrotus purpuratus</i> | Spu_piwi  | XP_030846820.1 |
|               | <i>Lytechinus variegatus</i>         | Lva_piwi  | XP_041456323.1 |
|               | <i>Patiria miniata</i>               | Pmi_piwi  | XP_038059144.1 |
| Chordata      | (outgroup) <i>Mus musculus</i>       | Mmu_Ago1  | NP_700452.2    |
|               | <i>Mus musculus</i>                  | Mmu_piwi1 | NP_067286.1    |
|               | <i>Mus musculus</i>                  | Mmu_piwi2 | NP_067283.1    |
|               | <i>Mus musculus</i>                  | Mmu_piwi4 | BAF65667.1     |
|               | <i>Danio rerio</i>                   | Dre_piwi1 | NP_899181.1    |
|               | <i>Danio rerio</i>                   | Dre_piwi2 | ACF35261.1     |
|               | <i>Branchiostoma floridae</i>        | Bfl_piwi1 | XP_035691448.1 |
|               | <i>Branchiostoma floridae</i>        | Bfl_piwi2 | AGI95997.1     |
| Cnidaria      | <i>Actinia tenebrosa</i>             | Ate_piwi  | XP_031558248.1 |
|               | <i>Hydra vulgaris</i>                | Hvu_piwi  | AFQ20832.1     |
|               | <i>Nematostella vectensis</i>        | Nve_piwi  | ASW22510.1     |
|               | <i>Nematostella vectensis</i>        | Nve_piwi2 | ASW22511.1     |
|               | <i>Podocoryna carnea</i>             | Pca_piwi  | AAS01181.1     |

**Table S4.** GenBank accession numbers for sequences used for Nanos amino acid alignments.

| Phylum        | Species                        | Gene name in tree | GenBank #      |
|---------------|--------------------------------|-------------------|----------------|
| Annelida      | <i>Alitta virens</i>           | Avi_nanos         | UFQ91327.1     |
|               | <i>Capitella teleta</i>        | Cte_nanos         | DAA06318.1     |
|               | <i>Enchytraeus coronatus</i>   | Eco_nanos1        | OR750678       |
|               | <i>Enchytraeus coronatus</i>   | Eco_nanos2        | OR750679       |
|               | <i>Helobdella robusta</i>      | Hro_nanos         | AAB63111.1     |
|               | <i>Helobdella robusta</i>      | Hro_nanos1a       | XP_009018920.1 |
|               | <i>Paranais litoralis</i>      | Pli_nanos         | ADE44351.1     |
|               | <i>Platynereis dumerilii</i>   | Pdu_nanos         | CAJ28985.1     |
|               | <i>Pristina leidy</i>          | Ple_nanos         | ADE44350.1     |
|               | <i>Tubifex tubifex</i>         | Ttu_nanos         | BAQ21630.1     |
| Mollusca      | <i>Crassostrea virginica</i>   | Cvi_nanos         | XP_022345706.1 |
|               | <i>Dreissena polymorpha</i>    | Dpo_nanos         | XP_052227042.1 |
|               | <i>Mizuhopecten yessoensis</i> | Mye_nanos1        | OWF49530.1     |
|               | <i>Mizuhopecten yessoensis</i> | Mye_nanos3        | OWF55054.1     |
|               | <i>Pecten maximus</i>          | Pma_nanos         | XP_033757476.1 |
| Echinodermata | <i>Lytechinus variegatus</i>   | Lva_nanos         | ANT70531.1     |

|          |                                      |              |                |
|----------|--------------------------------------|--------------|----------------|
| Chordata | <i>Strongylocentrotus purpuratus</i> | Spu_nanos1a  | XP_001177221.2 |
|          | <i>Strongylocentrotus purpuratus</i> | Spu_nanos2   | NP_001073023.1 |
|          | <i>Mus musculus</i>                  | Mmu_nanos1   | NP_848508.2    |
|          | <i>Mus musculus</i>                  | Mmu_nanos2   | NP_918953.2    |
|          | <i>Mus musculus</i>                  | Mmu_nanos3   | NP_918948.1    |
|          | <i>Xenopus laevis</i>                | Xla_nanos1   | NP_001081503.1 |
|          | <i>Xenopus tropicalis</i>            | Xtr_nanos3   | XP_004919225.1 |
|          | <i>Danio rerio</i>                   | Dre_nanos1   | NP_001292590.1 |
|          | <i>Danio rerio</i>                   | Dre_nanos2_2 | XP_009300191.1 |
|          | <i>Danio rerio</i>                   | Dre_nanos3   | NP_571953.1    |
| Cnidaria | <i>Hydra vulgaris</i>                | Hvu_nanos1   | BAB01491.1     |
|          | <i>Hydra vulgaris</i>                | Hvu_nanos2   | BAB01492.1     |
|          | <i>Nematostella vectensis</i>        | Nve_nanos1   | AAY67907.1     |
|          | <i>Nematostella vectensis</i>        | Nve_nanos2   | AAY67908.1     |
| Porifera | <i>Amphimedon queenslandica</i>      | Aqu_nanos    | XP_003384296.1 |
|          | <i>Ephydatia muelleri</i>            | Emu_nanos    | AJE59349.1     |

**Table S5.** GenBank accession numbers for sequences used for Myc amino acid alignments.

| Phylum        | Species                              | Gene name in tree | GenBank #      |
|---------------|--------------------------------------|-------------------|----------------|
| Annelida      | <i>Capitella teleta</i>              | Cte_myc           | ATN39075.1     |
|               | <i>Enchytraeus coronatus</i>         | Eco_myc           | OR750680       |
|               | <i>Helobdella robusta</i>            | Hro_myc           | XP_009030581.1 |
|               | <i>Owenia fusiformis</i>             | Ofu_myc           | CAH1774206.1   |
|               | <i>Platynereis dumerilii</i>         | Pdu_myc           | AGS55451.1     |
| Mollusca      | <i>Crassostrea virginica</i>         | Cvi_myc           | XP_022318424.1 |
|               | <i>Patella vulgata</i>               | Pvu_myc           | XP_050400774.1 |
|               | <i>Pecten maximus</i>                | Pma_myc           | XP_033738863.1 |
| Brachiopoda   | <i>Lingula anatina</i>               | Lan_myc           | XP_013410679.1 |
| Arthropoda    | <i>Drosophila melanogaster</i>       | Dme_myc           | AAD00517.1     |
|               | <i>Tribolium madens</i>              | Tma_myc           | XP_044270248.1 |
|               | <i>Daphnia pulex</i>                 | Dpu_myc           | EFX79343.1     |
|               | <i>Limulus polyphemus</i>            | Lpo_myc           | XP_013793685.1 |
| Echinodermata | <i>Patiria miniata</i>               | Pmi_myc           | XP_038057555.1 |
|               | <i>Strongylocentrotus purpuratus</i> | Spu_myc           | NP_999744.1    |
| Hemichordata  | <i>Saccoglossus kowalevskii</i>      | Sko_myc           | NP_001158444.1 |
| Chordata      | <i>Mus musculus</i>                  | Mmu_myc           | NP_034979.3    |
|               | <i>Danio rerio</i>                   | Dre_mycA          | NP_571487.2    |
|               | <i>Danio rerio</i>                   | Dre_mycB          | NP_956466.1    |
|               | <i>Branchiostoma floridae</i>        | Bfl_myc           | XP_002609915.1 |
| Cnidaria      | <i>Actinia tenebrosa</i>             | Ate_myc           | XP_031551646.1 |
|               | <i>Nematostella vectensis</i>        | Nve_myc           | XP_001627619.2 |

|          |                                        |         |                |
|----------|----------------------------------------|---------|----------------|
| Porifera | <i>Amphimedon queenslandica</i>        | Aqu_myc | XP_011408076.1 |
|          | <i>Halisarca dujardini</i>             | Hdu_myc | QSX72220.1     |
| Protista | (outgroup) <i>Monosiga brevicollis</i> | Mbr_myc | XP_001747958.1 |

**Table S6.** GenBank accession numbers for sequences used for Pumilio amino acid alignments.

| Phylum        | Species                              | Gene name in tree | GenBank #      |
|---------------|--------------------------------------|-------------------|----------------|
| Annelida      | <i>Capitella teleta</i>              | Cte_pum2          | ELT98839.1     |
|               | <i>Capitella teleta</i>              | Cte_pum3          | ELU16136.1     |
|               | <i>Enchytraeus coronatus</i>         | Eco_pum2          | OR750681       |
|               | <i>Enchytraeus coronatus</i>         | Eco_pum3          | OR750682       |
|               | <i>Helobdella robusta</i>            | Hro_pum2          | XP_009016071.1 |
|               | <i>Helobdella robusta</i>            | Hro_pum3          | XP_009029294.1 |
|               | <i>Owenia fusiformis</i>             | Ofu_pum3          | CAH1774281.1   |
| Mollusca      | <i>Crassostrea gigas</i>             | Cgi_pum2          | XP_011422894.2 |
|               | <i>Crassostrea gigas</i>             | Cgi_pum3          | XP_034313950.1 |
|               | <i>Lottia gigantea</i>               | Lgi_pum2          | XP_009063233.1 |
|               | <i>Lottia gigantea</i>               | Lgi_pum3          | XP_009047841.1 |
|               | <i>Patella vulgata</i>               | Pvu_pum3          | XP_050403075.1 |
|               | <i>Pecten maximus</i>                | Pma_pum3          | XP_033737990.1 |
| Brachiopoda   | <i>Lingula anatina</i>               | Lan_pum3          | XP_013407952.1 |
| Arthropoda    | <i>Drosophila melanogaster</i>       | Dme_pum           | NP_731314.1    |
|               | <i>Tribolium castaneum</i>           | Tca_pum           | EFA12956.2     |
|               | <i>Tribolium madens</i>              | Tma_pum2          | XP_044266097.1 |
|               | <i>Ixodes scapularis</i>             | Isc_pum2          | XP_029825330.2 |
|               | <i>Limulus polyphemus</i>            | Lpo_pum2          | XP_013786730.1 |
| Echinodermata | <i>Lytechinus variegatus</i>         | Lva_pum2          | XP_041466796.1 |
|               | <i>Lytechinus variegatus</i>         | Lva_pum3          | XP_041475303.1 |
|               | <i>Strongylocentrotus purpuratus</i> | Spu_pum2          | XP_030830065.1 |
|               | <i>Strongylocentrotus purpuratus</i> | Spu_pum3          | XP_030851927.1 |
|               | <i>Patiria miniata</i>               | Pmi_pum2          | XP_038051474.1 |
|               | <i>Patiria miniata</i>               | Pmi_pum3          | XP_038067463.1 |
| Chordata      | <i>Mus musculus</i>                  | Mmu_pum1          | NP_109647.2    |
|               | <i>Mus musculus</i>                  | Mmu_pum2          | XP_017170746.1 |
|               | <i>Mus musculus</i>                  | Mmu_pum3          | NP_001390013.1 |
|               | <i>Danio rerio</i>                   | Dre_pum1          | NP_001264048.1 |
|               | <i>Danio rerio</i>                   | Dre_pum2          | NP_001096040.2 |
|               | <i>Danio rerio</i>                   | Dre_pum3          | NP_001340777.1 |
| Cnidaria      | <i>Actinia tenebrosa</i>             | Ate_pum2          | XP_031566465.1 |
|               | <i>Actinia tenebrosa</i>             | Ate_pum3          | XP_031550523.1 |
|               | <i>Hydra vulgaris</i>                | Hvu_pum2          | XP_047145598.1 |
|               | <i>Hydra vulgaris</i>                | Hvu_pum3          | XP_002156370.2 |

|          |                                        |          |                |
|----------|----------------------------------------|----------|----------------|
|          | <i>Nematostella vectensis</i>          | Nve_pum2 | XP_032240209.1 |
|          | <i>Nematostella vectensis</i>          | Nve_pum3 | XP_001634611.1 |
| Porifera | <i>Amphimedon queenslandica</i>        | Aqu_pum2 | XP_011402944.1 |
|          | <i>Amphimedon queenslandica</i>        | Aqu_pum3 | XP_003387437.1 |
| Protista | (outgroup) <i>Monosiga brevicollis</i> | Mbr_pum  | XP_001749459.1 |

**Table S7.** GenBank accession numbers for sequences used for Tudor amino acid alignments.

| Phylum        | Species                              | Gene name in tree     | GenBank #      |
|---------------|--------------------------------------|-----------------------|----------------|
| Annelida      | <i>Capitella teleta</i>              | Cte_Tdrd_ELU14575     | ELU14575.1     |
|               | <i>Enchytraeus coronatus</i>         | Eco_tudor1            | OR750683       |
|               | <i>Enchytraeus coronatus</i>         | Eco_tudor2            | OR750684       |
|               | <i>Enchytraeus coronatus</i>         | Eco_tudor3            | OR750685       |
|               | <i>Owenia fusiformis</i>             | Ofu_Tdrd_CAH1803308   | CAH1803308.1   |
|               | <i>Platynereis dumerilii</i>         | Pdu_Tdrd_1            | CCK33035.1     |
|               | <i>Platynereis dumerilii</i>         | Pdu_Tdrd_2            | CCK33037.1     |
|               | <i>Platynereis dumerilii</i>         | Pdu_Tdrd_3            | CCK33036.1     |
| Mollusca      | <i>Crassostrea gigas</i>             | Cgi_Tdrd_XP_011447159 | XP_011447159.3 |
|               | <i>Patella vulgata</i>               | Pvu_Tdrd_6            | XP_050402777.1 |
|               | <i>Pecten maximus</i>                | Pma_Tdrd_XP_033738269 | XP_033738269.1 |
| Brachiopoda   | <i>Lingula anatina</i>               | Lan_Tdrd_XP_013386808 | XP_013386808.1 |
| Arthropoda    | <i>Drosophila melanogaster</i>       | Dme_tudor             | NP_476773.1    |
|               | <i>Drosophila melanogaster</i>       | Dme_papi              | NP_722773.1    |
|               | <i>Drosophila melanogaster</i>       | Dme_tejas             | NP_610950.2    |
|               | <i>Limulus polyphemus</i>            | Lpo_Tdrd_1            | XP_013776272.2 |
| Echinodermata | <i>Strongylocentrotus purpuratus</i> | Spu_Tdrd_XP_782950    | XP_782950.2    |
|               | <i>Strongylocentrotus purpuratus</i> | Spu_Tdrd_15_XP_780689 | XP_780689.2    |
|               | <i>Strongylocentrotus purpuratus</i> | Spu_Tdrd_XP_797685    | XP_797685.2    |
| Hemichordata  | <i>Saccoglossus kowalevskii</i>      | Sko_Tdrd_XP_002737010 | XP_002737010.1 |
| Chordata      | <i>Mus musculus</i>                  | Mmu_Tdrd_1            | NP_001002238.1 |
|               | <i>Mus musculus</i>                  | Mmu_Tdrd_5            | AAH99972.1     |
|               | <i>Mus musculus</i>                  | Mmu_Tdrd_6            | AAI45249.1     |
|               | <i>Mus musculus</i>                  | Mmu_Tdrd_7            | NP_666254.1    |
|               | <i>Xenopus laevis</i>                | Xla_Tdrd_5            | NP_001090599.1 |
|               | <i>Xenopus laevis</i>                | Xla_Tdrd_7            | NP_001084569.2 |
|               | <i>Xenopus tropicalis</i>            | Xtr_Tdrd_6            | XP_002938001.1 |
|               | <i>Xenopus tropicalis</i>            | Xtr_Tdrd_7            | NP_001011355.2 |
|               | <i>Danio rerio</i>                   | Dre_Tdrd_1            | NP_001157500.1 |
|               | <i>Danio rerio</i>                   | Dre_Tdrd_5            | AAI34986.1     |
|               | <i>Danio rerio</i>                   | Dre_Tdrd_6            | NP_001182210.1 |
|               | <i>Danio rerio</i>                   | Dre_Tdrd_7            | ABR24798.1     |
|               | <i>Branchiostoma floridae</i>        | Bfl_Tdrd_XP_002608013 | XP_002608013.1 |

|          |                                             |                         |                |
|----------|---------------------------------------------|-------------------------|----------------|
| Cnidaria | <i>Branchiostoma floridae</i>               | Bfl_Tdrd_XP_002609625   | XP_002609625.1 |
|          | <i>Branchiostoma floridae</i>               | Bfl_Tdrd_7_XP_002590816 | XP_002590816.1 |
|          | <i>Actinia tenebrosa</i>                    | Ate_Tdrd_XP_031549775   | XP_031549775.1 |
|          | <i>Hydra vulgaris</i>                       | Hvu_Tdrd_1              | XP_047129251.1 |
|          | <i>Hydra vulgaris</i>                       | Hvu_Tdrd_6              | XP_047142151.1 |
|          | <i>Hydra vulgaris</i>                       | Hvu_Tdrd_7              | XP_047145945.1 |
|          | <i>Nematostella vectensis</i>               | Nve_Tdrd_XP_001627217   | XP_001627217.1 |
|          | <i>Nematostella vectensis</i>               | Nve_Tdrd_XP_001628171   | XP_001628171.1 |
| Porifera | <i>Nematostella vectensis</i>               | Nve_Tdrd_EDO36108       | EDO36108.1     |
|          | <i>Amphimedon queenslandica</i>             | Aqu_Tdrd_1_XP_003388077 | XP_003388077.1 |
|          | <i>Amphimedon queenslandica</i>             | Aqu_Tdrd_XP_003384366   | XP_003384366.1 |
|          | <i>Oscarella lobularis</i>                  | Olo_Tdrd_1_AQX83031     | AQX83031.1     |
| Fungi    | (outgroup) <i>Schizosaccharomyces pombe</i> | Spo_snd1                | NP_588117.1    |

**Table S8.** GenBank accession numbers for sequences used for Boule amino acid alignments.

| Phylum          | Species                            | Gene name in tree | GenBank #      |
|-----------------|------------------------------------|-------------------|----------------|
| Annelida        | <i>Enchytraeus coronatus</i>       | Eco-boule1        | OR750686       |
|                 | <i>Enchytraeus coronatus</i>       | Eco-boule2        | OR750687       |
|                 | <i>Helobdella robusta</i>          | Hro_boule         | XP_009028824.1 |
|                 | <i>Owenia fusiformis</i>           | Ofu_boule         | CAH1789320.1   |
| Platyhelminthes | <i>Echinococcus multilocularis</i> | Emu_boule         | CDS41941.1     |
|                 | <i>Macrostomum lignano</i>         | Mli_boule1        | ADL09421.1     |
|                 | <i>Macrostomum lignano</i>         | Mli_boule2        | AEK69206.1     |
|                 | <i>Macrostomum lignano</i>         | Mli_boule3        | AEK69207.1     |
|                 | <i>Schmidtea mediterranea</i>      | Sme_boule1        | ANE21796.1     |
|                 | <i>Schmidtea mediterranea</i>      | Sme_boule2        | ANE21797.1     |
| Mollusca        | <i>Aplysia californica</i>         | Aca_boule         | XP_005103136.2 |
|                 | <i>Crassostrea gigas</i>           | Cgi_boule         | XP_034310513.1 |
|                 | <i>Crassostrea virginica</i>       | Cvi_boule         | XP_022305710.1 |
|                 | <i>Octopus vulgaris</i>            | Ovu_boule         | CAI9742253.1   |
|                 | <i>Patella vulgata</i>             | Pvu_boule         | XP_050418578.1 |
|                 | <i>Pecten maximus</i>              | Pma_boule         | XP_033761447.1 |
|                 | <i>Sepia pharaonis</i>             | Sph_boule         | CAE1318733.1   |
| Brachiopoda     | <i>Lingula anatina</i>             | Lan_boule         | XP_013418885.1 |
| Arthropoda      | <i>Drosophila melanogaster</i>     | Dme_boule         | AAF50316.3     |
|                 | <i>Aedes albopictus</i>            | Aal_boule         | XP_029725578.1 |
|                 | <i>Anopheles arabiensis</i>        | Aar_boule         | XP_040155388.1 |
|                 | <i>Apis mellifera</i>              | Ame_boule         | XP_003250213.1 |
|                 | <i>Culex quinquefasciatus</i>      | Cqu_boule         | XP_038118889.1 |
|                 | <i>Nasonia vitripennis</i>         | Nvi_boule         | XP_001599398.1 |
|                 | <i>Tribolium castaneum</i>         | Tca_boule         | EFA05679.2     |



|               |                                            |                |                |
|---------------|--------------------------------------------|----------------|----------------|
| Echinodermata | <i>Strongylocentrotus purpuratus</i>       | XP_030846218.1 | Spu_boule      |
|               | <i>Patiria miniata</i>                     | Pmi_boule      | XP_038044814.1 |
| Hemichordata  | <i>Saccoglossus kowalevskii</i>            | Sko_boule      | XP_006818817.1 |
| Chordata      | <i>Mus musculus</i>                        | Mmu_boule      | NP_001354816.1 |
|               | <i>Oryzias latipes</i>                     | Ola_boule      | ACU31026.1     |
| Cnidaria      | <i>Actinia tenebrosa</i>                   | Ate_boule      | XP_031560060.1 |
|               | <i>Nematostella vectensis</i>              | Nve_boule      | XP_032243176.2 |
| Fungi         | (outgroup) <i>Saccharomyces cerevisiae</i> | Sce_HRP1       | CAA99142.1     |

**Table S9.** GenBank accession numbers for sequences used for RRM domain protein Bruno amino acid alignments.

| Phylum      | Species                        | Gene name in tree      | GenBank #      |
|-------------|--------------------------------|------------------------|----------------|
| Annelida    | <i>Capitella teleta</i>        | Cte_ELU11974           | ELU11974.1     |
|             | <i>Capitella teleta</i>        | Cte_ELT93212           | ELT93212.1     |
|             | <i>Enchytraeus coronatus</i>   | Eco_bruno1             | OR750688       |
|             | <i>Enchytraeus coronatus</i>   | Eco_bruno2             | OR750689       |
|             | <i>Enchytraeus coronatus</i>   | Eco_bruno3             | OR750690       |
|             | <i>Enchytraeus coronatus</i>   | Eco_bruno4             | OR750691       |
|             | <i>Helobdella robusta</i>      | Hro_XP_009029960       | XP_009029960.1 |
|             | <i>Helobdella robusta</i>      | Hro_XP_009009284       | XP_009009284.1 |
|             | <i>Helobdella robusta</i>      | Hro_ESN89902           | ESN89902.1     |
|             | <i>Helobdella robusta</i>      | Hro_XP_009031985       | XP_009031985.1 |
|             | <i>Malacoceros fuliginosus</i> | Mfu_CUGBP_elav_like_3  | QNN94692.1     |
|             | <i>Owenia fusiformis</i>       | Ofu_celf               | QWY04388.1     |
|             | <i>Platynereis dumerilii</i>   | Pdu_bruno              | CCK33023.1     |
| Mollusca    | <i>Crassostrea gigas</i>       | Cgi_CUGBP_elav_like_2  | XP_034333010.1 |
|             | <i>Crassostrea gigas</i>       | Cgi_CUGBP_elav_like_3B | XP_034317472.1 |
|             | <i>Lamellibrachia satsuma</i>  | Lsa_CUGBP_elav_like_4  | KAI0219664.1   |
|             | <i>Lottia gigantea</i>         | Lgi_XP_009047452       | XP_009047452.1 |
|             | <i>Lottia gigantea</i>         | Lgi_XP_009055917       | XP_009055917.1 |
|             | <i>Patella vulgata</i>         | Pvu_CUGBP_elav_like_2  | XP_050392146.2 |
|             | <i>Patella vulgata</i>         | Pvu_CUGBP_elav_like_3B | XP_050395857.1 |
|             | <i>Pecten maximus</i>          | Pma_CUGBP_elav_like_2  | XP_033740337.1 |
| Brachiopoda | <i>Pecten maximus</i>          | Pma_CUGBP_elav_like_4  | XP_033725903.1 |
|             | <i>Lingula anatina</i>         | Lan_CUGBP_elav_like_2  | XP_013383614.1 |
|             | <i>Lingula anatina</i>         | Lan_CUGBP_elav_like_3A | XP_013408611.1 |
| Arthropoda  | <i>Drosophila melanogaster</i> | Dme_bruno1_isoformB    | NP_723737.1    |
|             | <i>Drosophila melanogaster</i> | Dme_bruno2_isoformE    | NP_001036356.1 |
|             | <i>Drosophila melanogaster</i> | Dme_bruno3_isoformA    | NP_729923.1    |
|             | <i>Tribolium castaneum</i>     | Tca_CUGBP_elav_like_2  | XP_015838769.1 |
|             | <i>Tribolium castaneum</i>     | Tca_CUGBP_elav_like_4  | XP_015839523.1 |
|             | <i>Ixodes scapularis</i>       | Isc_XP_002436197       | XP_002436197.1 |

|               |                                      |                        |                |
|---------------|--------------------------------------|------------------------|----------------|
|               | <i>Ixodes scapularis</i>             | Isc_XP_002404307       | XP_002404307.1 |
|               | <i>Limulus polyphemus</i>            | Lpo_CUGBP_elav_like_2  | XP_022236600.1 |
|               | <i>Limulus polyphemus</i>            | Lpo_CUGBP_elav_like_4  | XP_013783377.2 |
| Echinodermata | <i>Lytechinus variegatus</i>         | Lva_CUGBP_elav_like_3B | XP_041459854.1 |
|               | <i>Strongylocentrotus purpuratus</i> | Spu_CUGBP_elav_like_1A | XP_782270.3    |
|               | <i>Strongylocentrotus purpuratus</i> | Spu_CUGBP_elav_like_2  | XP_030844245.1 |
|               | <i>Strongylocentrotus purpuratus</i> | Spu_CUGBP_elav_like_3  | XP_030829134.1 |
|               | <i>Strongylocentrotus purpuratus</i> | Spu_CUGBP_elav_like_4  | XP_781047.2    |
| Hemichordata  | <i>Saccoglossus kowalevskii</i>      | Sko_bruno_like         | NP_001161510.1 |
|               | <i>Saccoglossus kowalevskii</i>      | Sko_bruno2_like        | XP_002736280.1 |
| Chordata      | (outgroup) <i>Mus musculus</i>       | Mmu_elav_1             | NP_034615.2    |
|               | <i>Mus musculus</i>                  | Mmu_CUGBP_elav_like_1  | NP_059064.2    |
|               | <i>Mus musculus</i>                  | Mmu_CUGBP_elav_like_2  | NP_001103698.1 |
|               | <i>Mus musculus</i>                  | Mmu_CUGBP_elav_like_3  | NP_766022.1    |
|               | <i>Mus musculus</i>                  | Mmu_CUGBP_elav_like_4  | XP_036016831.1 |
|               | <i>Mus musculus</i>                  | Mmu_CUGBP_elav_like_5  | NP_795928.2    |
|               | <i>Mus musculus</i>                  | Mmu_CUGBP_elav_like_6  | NP_780444.2    |
|               | <i>Xenopus tropicalis</i>            | Xtr_CUGBP_elav_like_3  | NP_001016491.1 |
|               | <i>Xenopus tropicalis</i>            | Xtr_CUGBP_elav_like_4  | NP_001072378.1 |
|               | <i>Xenopus tropicalis</i>            | Xtr_CUGBP_elav_like_5  | NP_001090639.1 |
|               | <i>Danio rerio</i>                   | Dre_CUGBP_elav_like_1  | NP_571688.1    |
|               | <i>Danio rerio</i>                   | Dre_CUGBP_elav_like_2  | NP_919382.1    |
|               | <i>Danio rerio</i>                   | Dre_CUGBP_elav_like_3  | NP_571569.2    |
|               | <i>Danio rerio</i>                   | Dre_CUGBP_elav_like_4  | NP_001002562.1 |
|               | <i>Danio rerio</i>                   | Dre_CUGBP_elav_like_5A | NP_001124260.1 |
|               | <i>Danio rerio</i>                   | Dre_celf3              | XP_001335316.2 |
|               | <i>Danio rerio</i>                   | Dre_CUGBP_elav_like_6  | XP_001334980.2 |
|               | <i>Branchiostoma floridae</i>        | Bfl_CUGBP_elav_like_2  | XP_035664982.1 |
|               | <i>Branchiostoma floridae</i>        | Bfl_CUGBP_elav_like_4  | XP_035668685.1 |
|               | <i>Branchiostoma floridae</i>        | Bfl_CUGBP_elav_like_3A | XP_035668681.1 |
|               | <i>Branchiostoma floridae</i>        | Bfl_XP_002588859       | XP_002588859.1 |
|               | <i>Branchiostoma floridae</i>        | Bfl_XP_002588860       | XP_002588860.1 |
| Cnidaria      | <i>Nematostella vectensis</i>        | Nve_CUGBP_elav_like_2  | XP_048578496.1 |
|               | <i>Nematostella vectensis</i> , ,    | Nve_XP_001627659       | XP_001627659.1 |
|               | <i>Nematostella vectensis</i>        | Nve_XP_001622676       | XP_001622676.1 |
|               | <i>Nematostella vectensis</i>        | Nve_XP_001621619       | XP_001621619.1 |
| Protista      | <i>Monosiga brevicollis</i>          | Mbr_XP_001745306       | XP_001745306.1 |

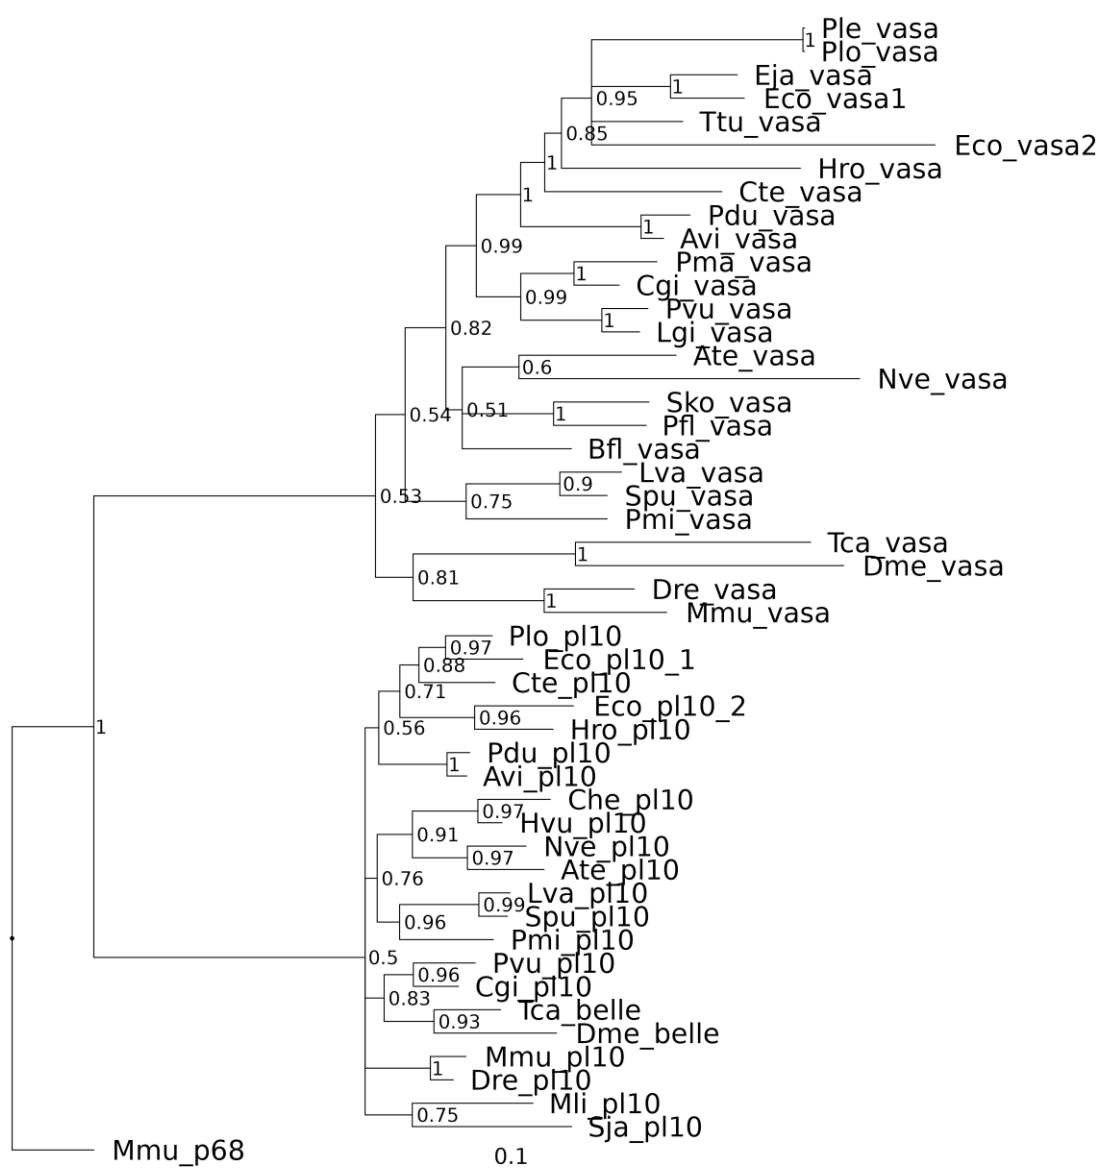

**Figure S1.** Phylogenetic analysis of *Enchytraeus coronatus Vasa* and *Pl10* homologs. Bayesian consensus tree of the Helicase domains of metazoan *Vasa* and *Pl10* genes.

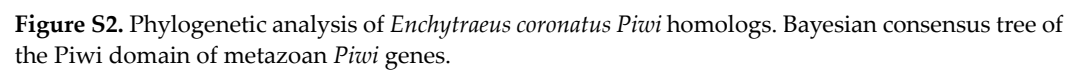

**Figure S2.** Phylogenetic analysis of *Enchytraeus coronatus* *Piwi* homologs. Bayesian consensus tree of the *Piwi* domain of metazoan *Piwi* genes.

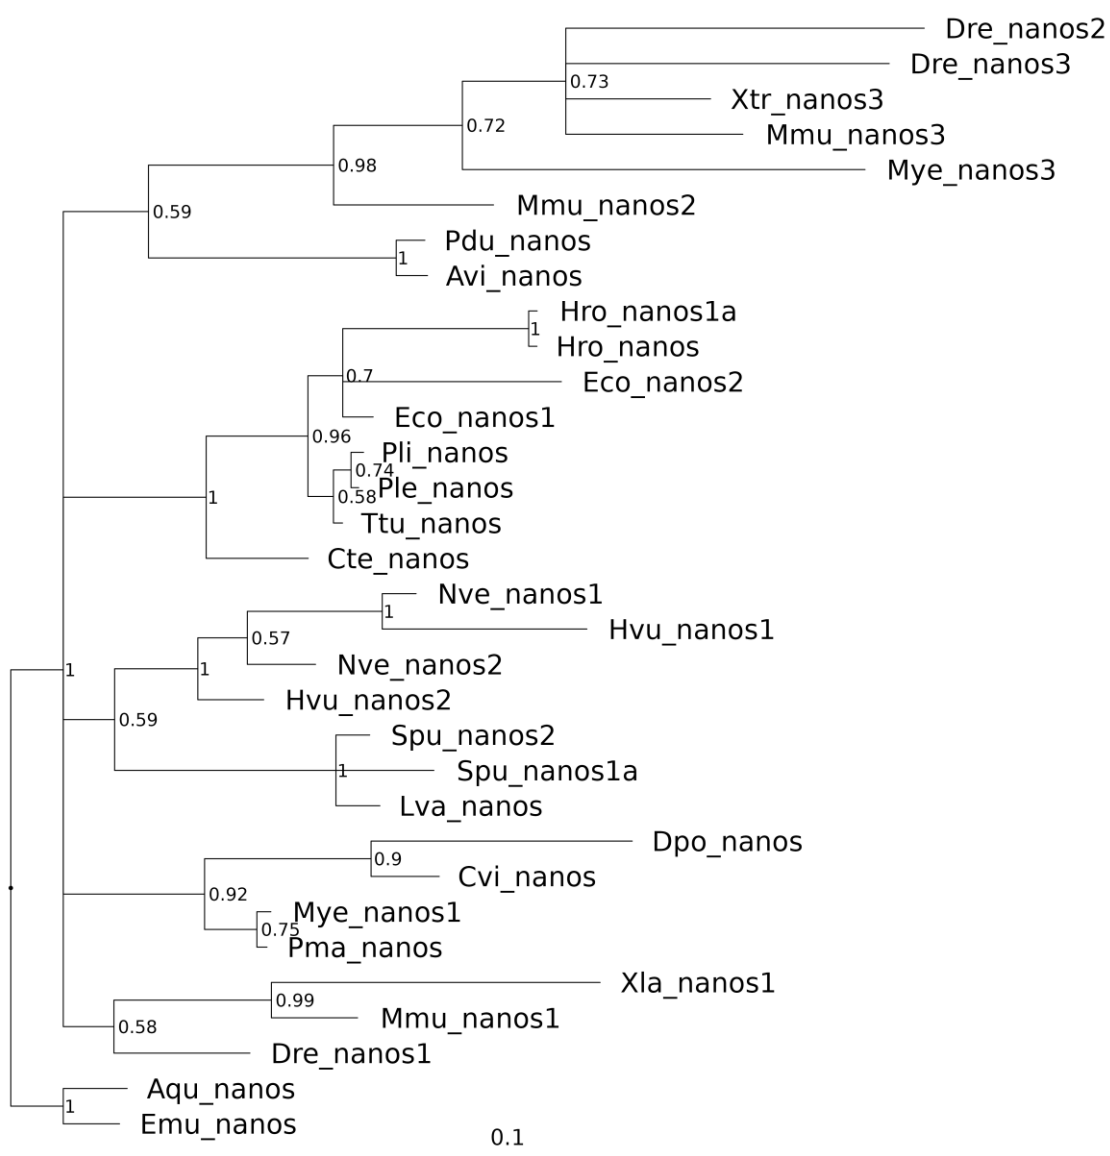

**Figure S3.** Phylogenetic analysis of *Enchytraeus coronatus* *Nanos* homologs. Bayesian consensus tree of the *Nanos* (CCHC)-type zinc-finger domain of metazoan *Nanos* genes.

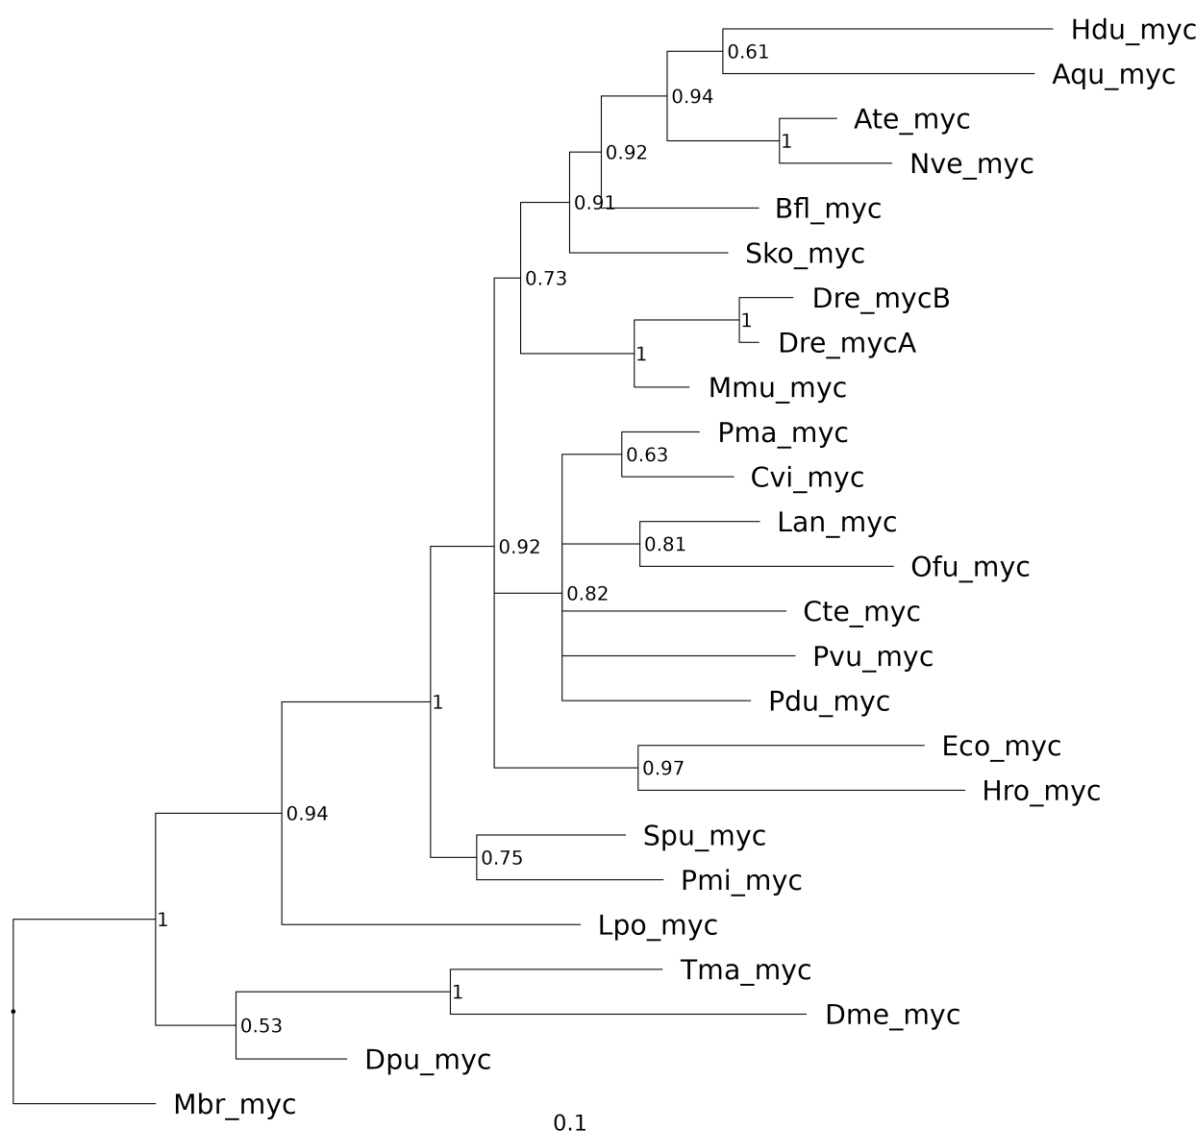

**Figure S4.** Phylogenetic analysis of *Enchytraeus coronatus* Myc homolog. Bayesian consensus tree of the Myc-type basic helix-loop-helix (bHLH) domain of metazoan Myc genes.

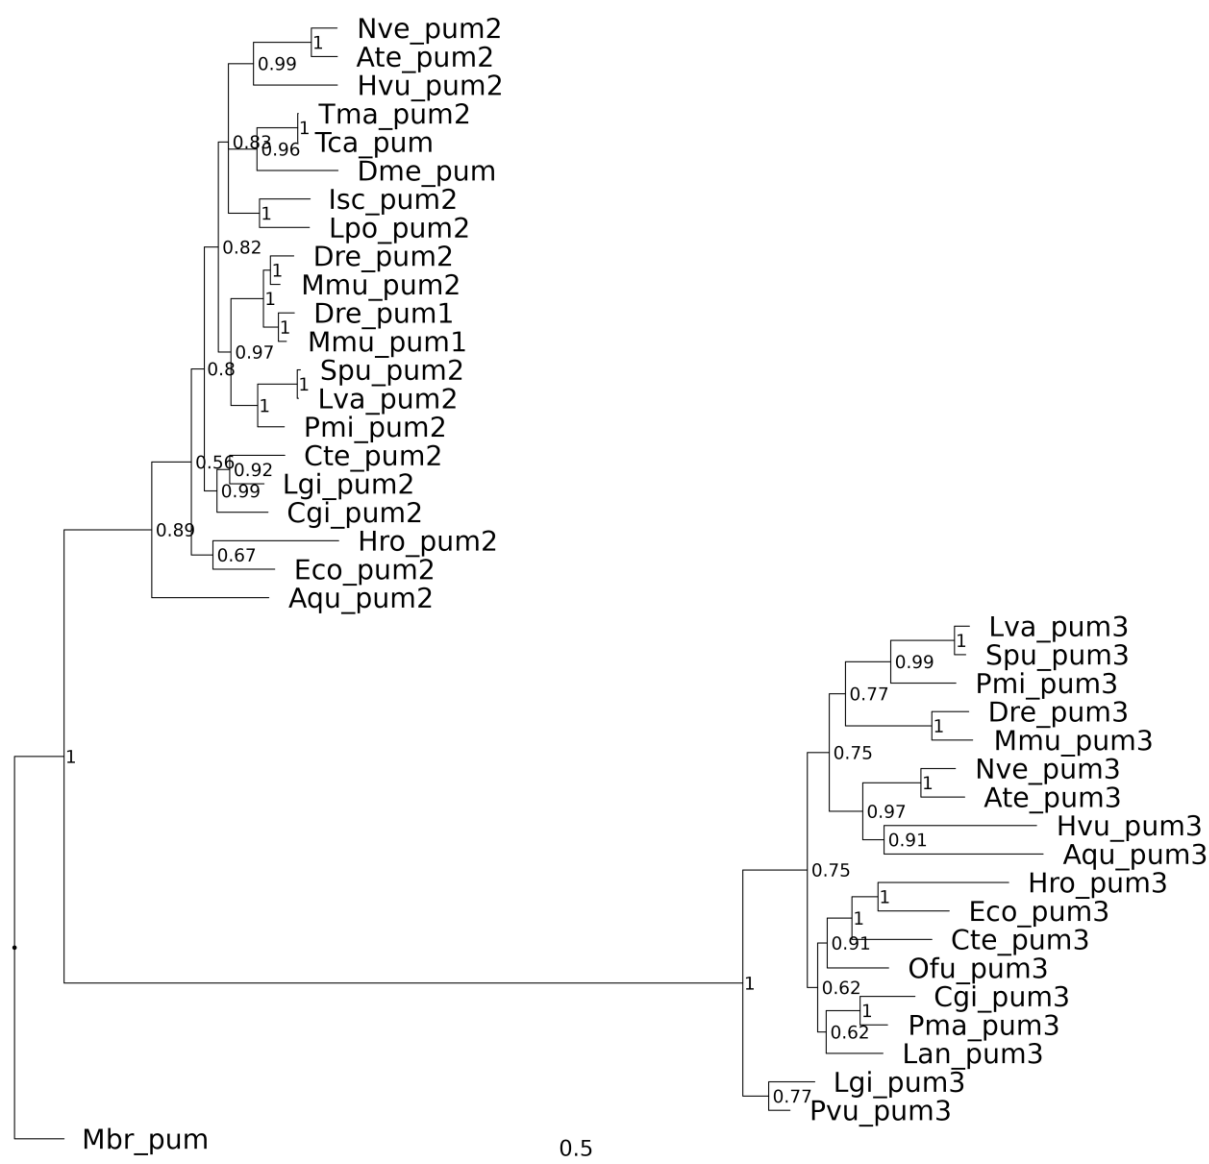

**Figure S5.** Phylogenetic analysis of *Enchytraeus coronatus* *Pumilio* homologs. Bayesian consensus tree of the *Pumilio* domain of metazoan *Pumilio* genes.

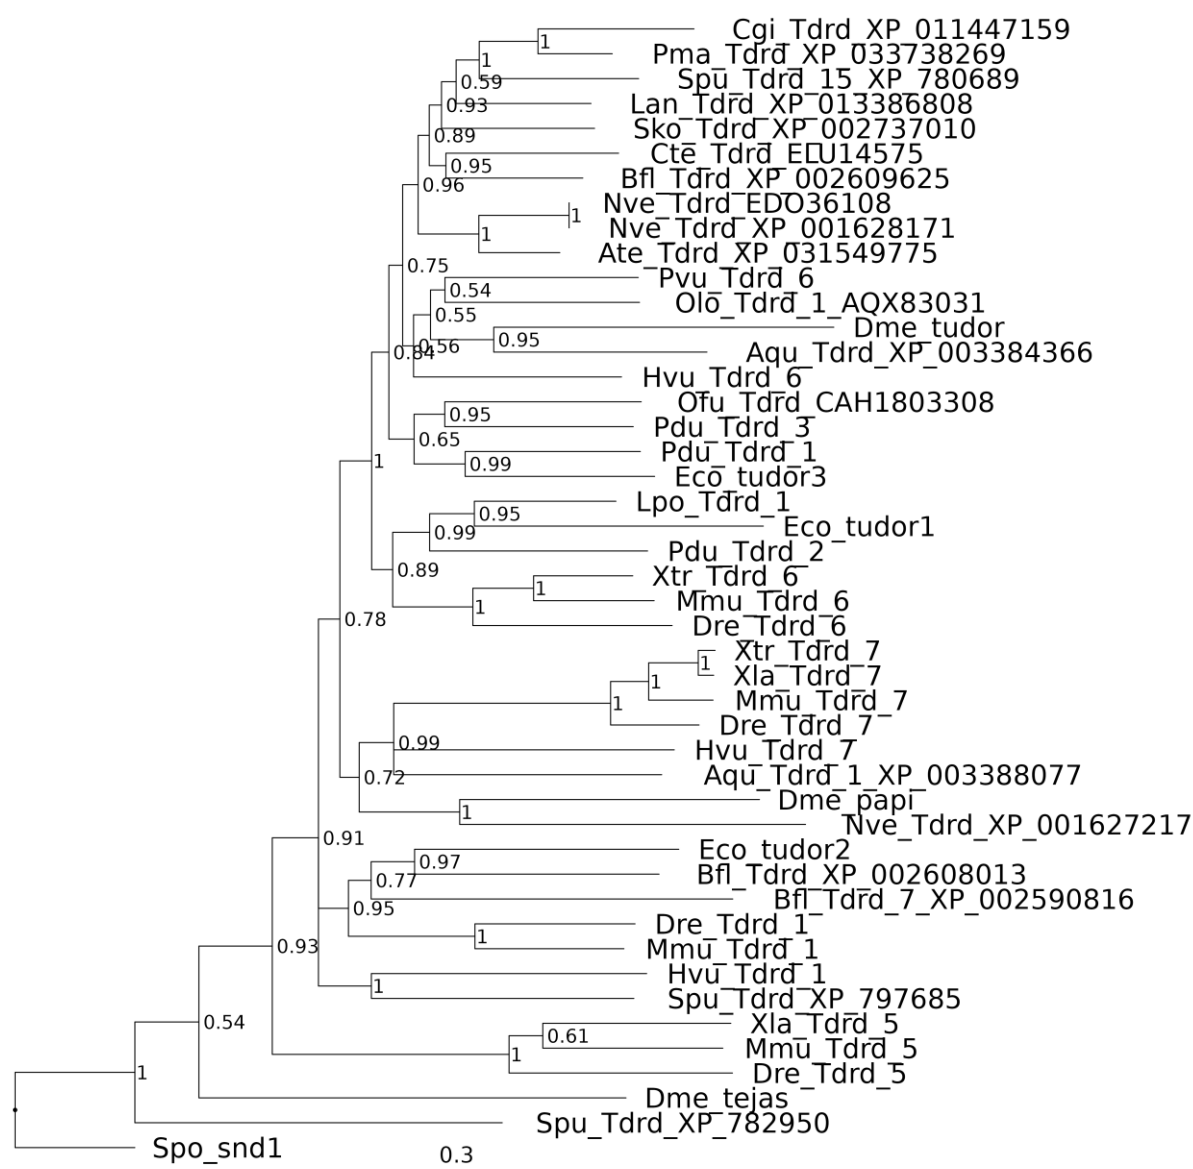

**Figure S6.** Phylogenetic analysis of *Enchytraeus coronatus* Tudor homologs. Bayesian consensus tree of the full-length alignment of metazoan Tudor genes.



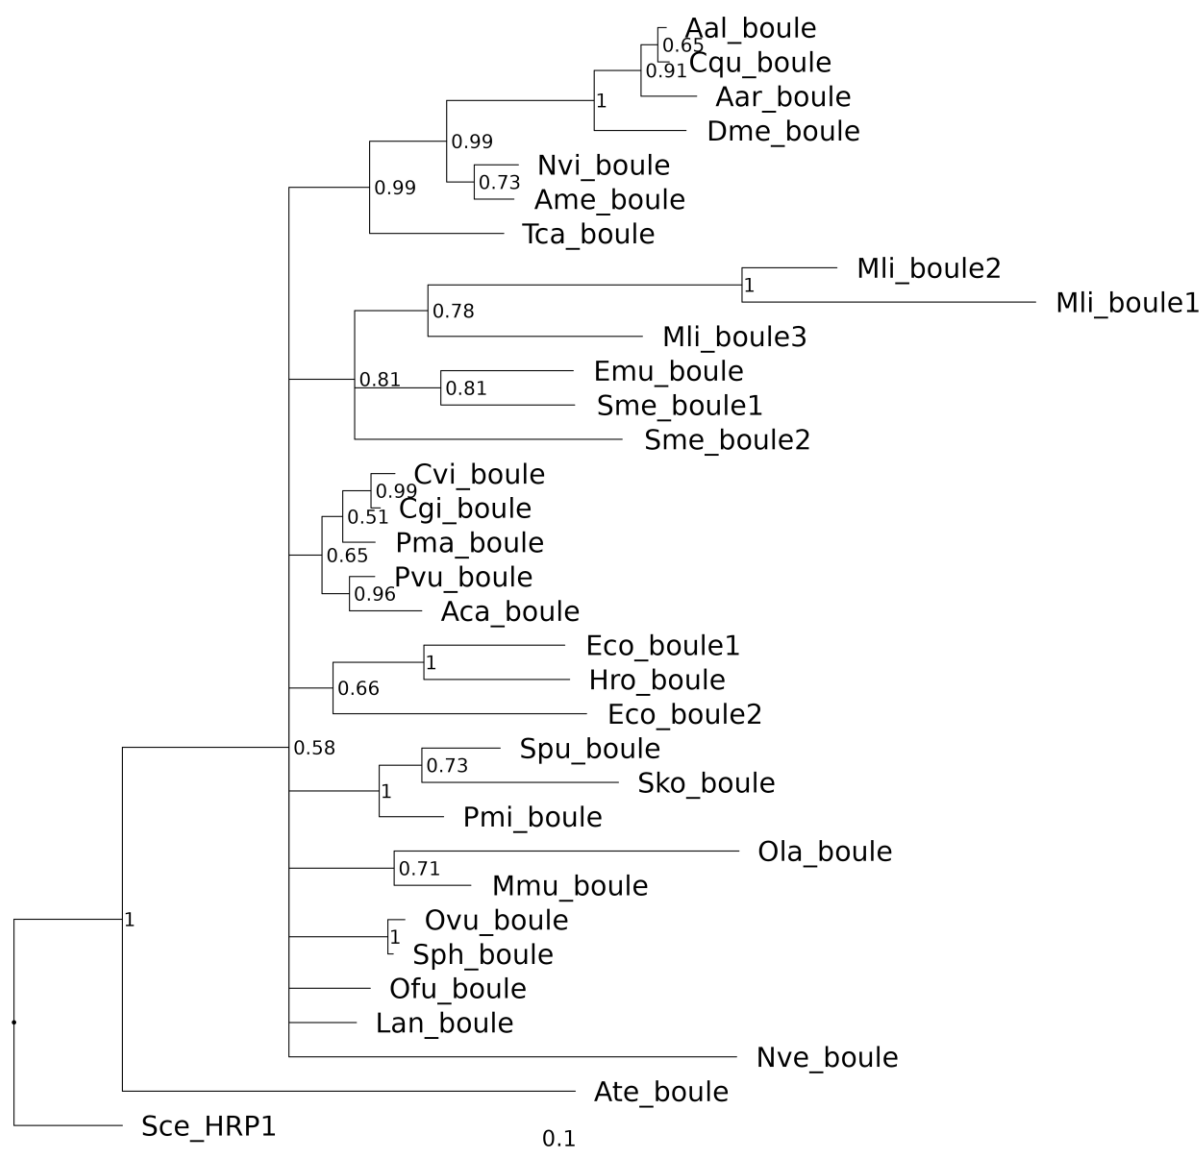

**Figure S7.** Phylogenetic analysis of *Enchytraeus coronatus* Boule homologs. Bayesian consensus tree of the Boule RRM domain of metazoan Boule genes.

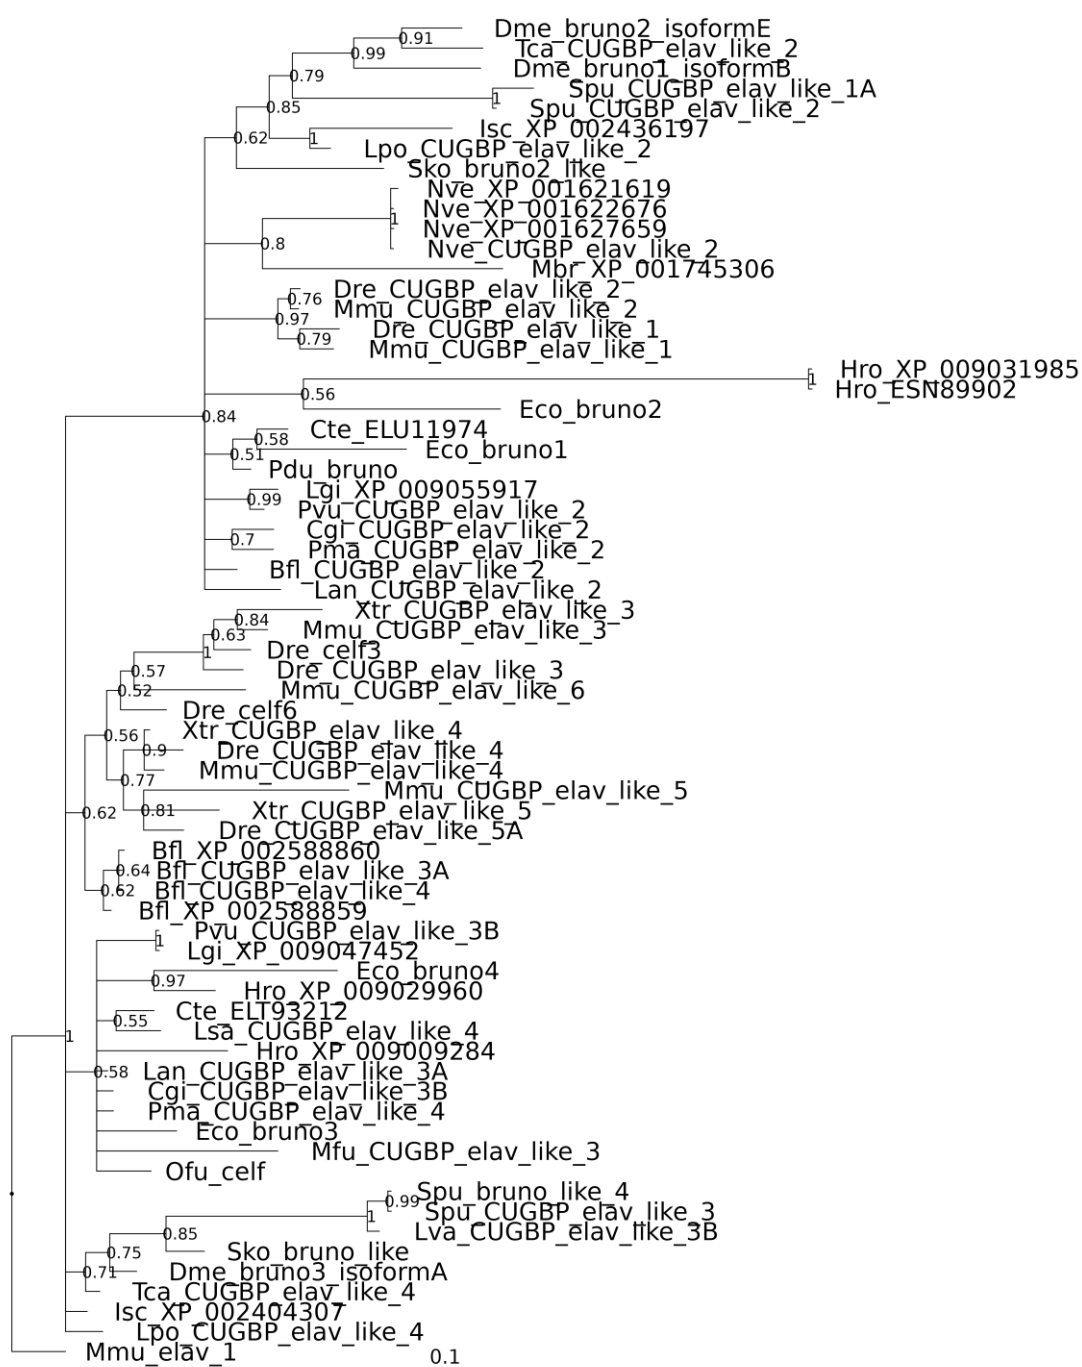

**Figure S8.** Phylogenetic analysis of *Enchytraeus coronatus* Bruno homologs. Bayesian consensus tree of the Bruno RRM domain of metazoan Bruno/CUGBP-Elav-like genes.

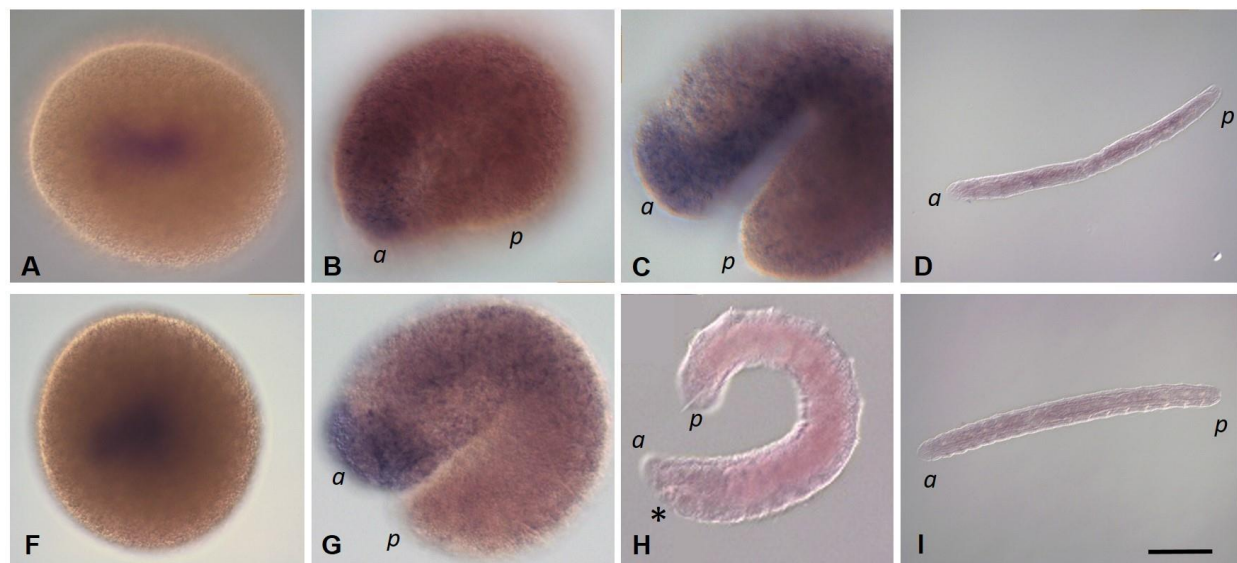

**Figure S9.** *Eco-boule1* and *Eco-boule2* expression patterns. *Eco-boule1* (A–D) and *Eco-boule2* (F–I) expression patterns. (A,F) mRNA of both *Boule* orthologs is detected in oocytes. (B) *Eco-boule1* expression in the descendants of the animal micromeres and germband cells. (C) *Eco-boule1* expression becomes particularly prominent in cells of the animal pole and the ventral side of the anterior part of the embryo. (G) *Eco-boule2* expression in superficial cells is very weak, except for a domain in the most anterior part of the embryo. (D,I) In juvenile, no expression of identified *Boule* homologs is detected by WMISH. Asterisk marks the mouth position; *a* and *p* mark the anterior and posterior end, respectively. Scale bar, 50  $\mu\text{m}$  for all panels except D, H and I. Scale bar in D and I, 170  $\mu\text{m}$ ; in H, 80  $\mu\text{m}$ .
